# Supplementary material for: High-resolution capillary electrophoresis for the determination of carbamylated albumin
Source: publisher site journal article supplement (doi:10.1515/cclm-2021-0926), 2021-11-09
Supplement: Supplementary file 1 [file j_cclm-2021-0926_suppl.docx]

**Supplemental Figure 1**

Electrophoretic data used to calculate the theoretical plate number and the symmetry factor (a) on the Helena V8 and (b) the Sebia Capillarys 2.

**(A)**

**
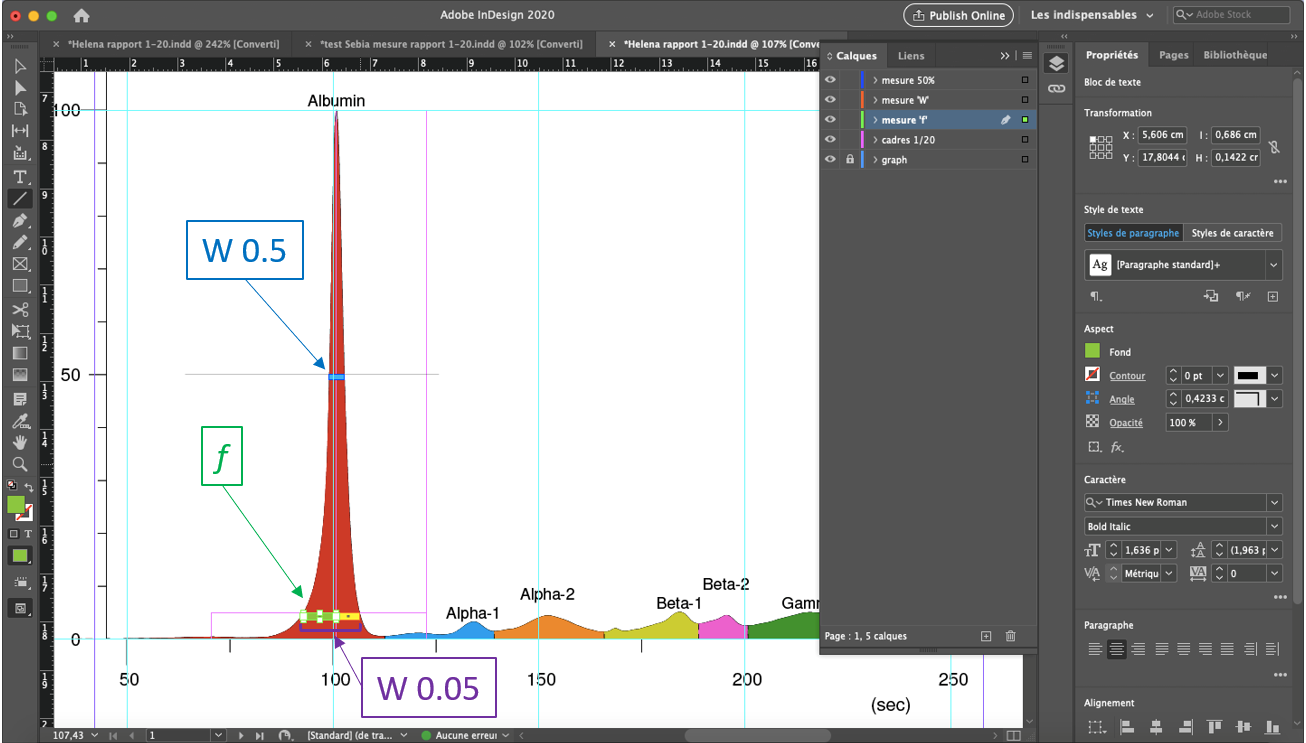
**

**(B)**

**
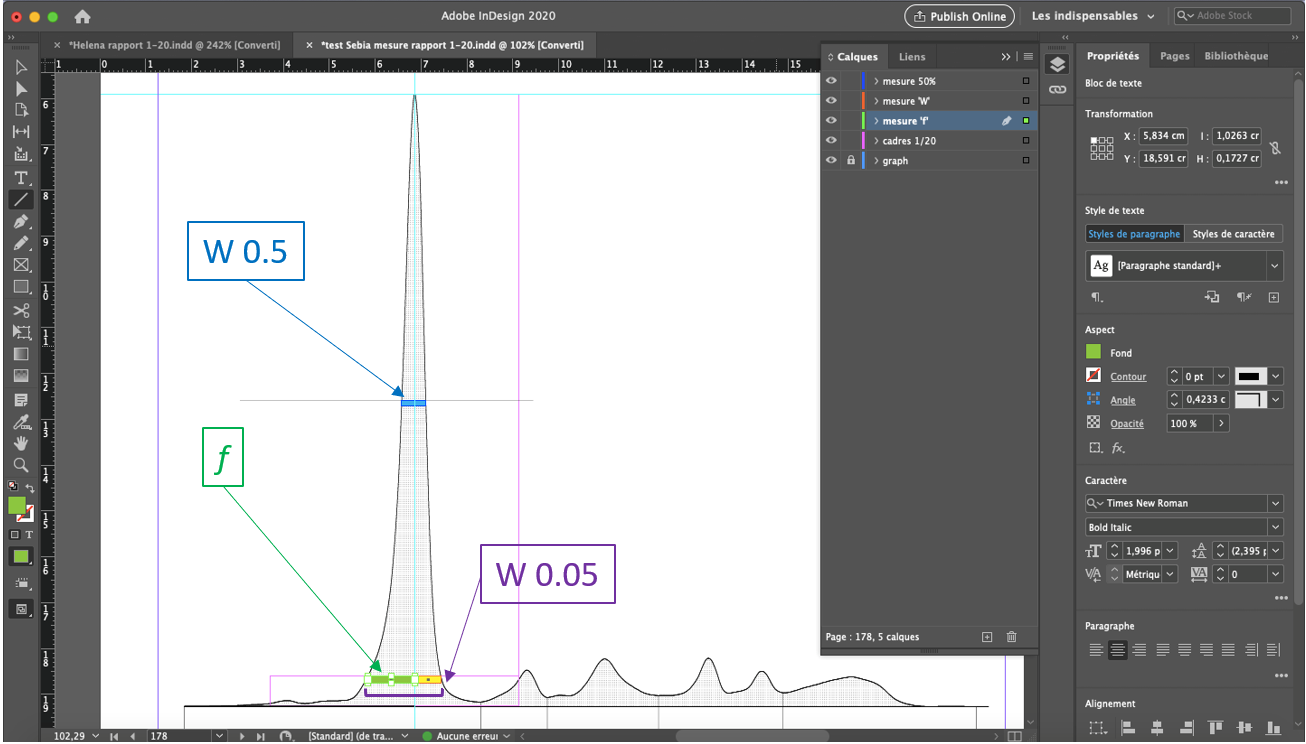
**
